# Supplementary material for: Impact of Bovine Diet on Metabolomic Profile of Skim Milk and Whey Protein Ingredients
Source: PubMed Central journal article supplement (PMC6950411; doi:10.3390/metabo9120305), 2019-12-17
Supplement: metabolites-09-00305-s001.pdf [file metabolites-09-00305-s001.pdf]

## Supplementary data

**Table S1:** Average concentrations of total metabolites ( $\mu\text{M}$ ) for skim milk powder derived from perennial ryegrass (GRS), perennial ryegrass/white clover (CLV) and total mixed ration (TMR) feeding systems, determined by LC-MS/MS.

<sup>a,b</sup> indicates values within a row not sharing a common superscript letter differed significantly ( $p < 0.05$ ).

\* denotes where a replicate was below the limit of detection or limit of quantification.

| Metabolite ( $\mu\text{M}$ ) | GRS                               | CLV                               | TMR                             |
|------------------------------|-----------------------------------|-----------------------------------|---------------------------------|
| Acetylmethionine             | 0.97 ( $\pm$ 0.07)                | 0.60 ( $\pm$ 0.08)                | 0.88 ( $\pm$ 0.54)              |
| Alanine                      | 34.1 ( $\pm$ 2.90)                | 30.2 ( $\pm$ 3.32)                | 41.9 ( $\pm$ 1.20)              |
| alpha-Aminoadipic acid       | 6.86 ( $\pm$ 0.47)                | 5.45 ( $\pm$ 2.26)                | 7.42 ( $\pm$ 1.83)              |
| Arginine                     | 14.2 ( $\pm$ 0.42)                | 14.6 ( $\pm$ 1.70)                | 16.6 ( $\pm$ 0.14)              |
| Asparagine                   | 1.41 ( $\pm$ 0.84)                | 2.11*                             | 1.29 ( $\pm$ 0.16)              |
| Aspartic acid                | 10.2 ( $\pm$ 3.34)                | 17.3 ( $\pm$ 4.38)                | 11.5 ( $\pm$ 2.38)              |
| Asymmetric dimethylarginine  | 0.09 ( $\pm$ 0.09)                | 0.05 ( $\pm$ 0.03)                | 0.09 ( $\pm$ 0.01)              |
| Betaine                      | 74.2 ( $\pm$ 20.01)               | 61.0 ( $\pm$ 19.30)               | 94.2 ( $\pm$ 12.52)             |
| Carnosine                    | 0.35 ( $\pm$ 0.02)                | 0.40 ( $\pm$ 0.04)                | 0.47 ( $\pm$ 0.08)              |
| Choline                      | 1245 ( $\pm$ 190.92)              | 1024 ( $\pm$ 319.61)              | 1035 ( $\pm$ 35.36)             |
| cis-4-Hydroxyproline         | 0.31 ( $\pm$ 0.00)                | 0.34 ( $\pm$ 0.01)                | 0.32 ( $\pm$ 0.01)              |
| Citrulline                   | 1.89 ( $\pm$ 0.16)                | 1.71 ( $\pm$ 0.94)                | 2.29 ( $\pm$ 0.47)              |
| Creatine                     | 512 ( $\pm$ 7.07)                 | 507 ( $\pm$ 4.24)                 | 567 ( $\pm$ 65.76)              |
| Creatinine                   | 111 ( $\pm$ 2.83)                 | 93.1 ( $\pm$ 14.00)               | 92.6 ( $\pm$ 3.82)              |
| Diacetylspermine             | 0.03 ( $\pm$ 0.00)                | 0.03 ( $\pm$ 0.00)                | 0.03 ( $\pm$ 0.00)              |
| Dihydroxyphenylalanine       | 0.18 ( $\pm$ 0.02)                | 0.16 ( $\pm$ 0.00)                | 0.15 ( $\pm$ 0.02)              |
| Dopamine                     | 0.08 ( $\pm$ 0.00)                | 0.08 ( $\pm$ 0.00)                | 0.08 ( $\pm$ 0.00)              |
| Glutamic acid                | 256 ( $\pm$ 7.07)                 | 284 ( $\pm$ 12.73)                | 241 ( $\pm$ 7.07)               |
| Glutamine                    | 4.38 ( $\pm$ 0.54) <sup>a</sup>   | 4.95 ( $\pm$ 1.24) <sup>a</sup>   | 12.4 ( $\pm$ 0.28) <sup>b</sup> |
| Glycine                      | 65.0 ( $\pm$ 28.35)               | 54.3 ( $\pm$ 13.86)               | 74.1 ( $\pm$ 16.55)             |
| Histidine                    | 2.35 ( $\pm$ 0.57)                | 2.37 ( $\pm$ 0.42)                | 3.41 ( $\pm$ 0.43)              |
| Isoleucine                   | 2.49 ( $\pm$ 0.62)                | 2.40 ( $\pm$ 0.03)                | 4.32 ( $\pm$ 0.23)              |
| Leucine                      | 2.67 ( $\pm$ 1.14)                | 3.10 ( $\pm$ 0.95)                | 5.59 ( $\pm$ 1.20)              |
| Lysine                       | 15.8 ( $\pm$ 2.05)                | 13.8 ( $\pm$ 1.48)                | 12.9 ( $\pm$ 0.28)              |
| Methionine                   | 0.66 ( $\pm$ 0.03)                | 0.71 ( $\pm$ 0.18)                | 0.42 ( $\pm$ 0.08)              |
| Methionine sulfoxide         | 0.07*                             | 0.00*                             | 0.22 ( $\pm$ 0.13)              |
| Methylhistidine              | 1.20 ( $\pm$ 0.15)                | 0.99 ( $\pm$ 0.07)                | 1.00 ( $\pm$ 0.07)              |
| Ornithine                    | 2.24 ( $\pm$ 0.68)                | 2.11 ( $\pm$ 0.87)                | 4.14 ( $\pm$ 0.57)              |
| Phenylalanine                | 1.44 ( $\pm$ 0.01)                | 1.19 ( $\pm$ 0.06)                | 1.42 ( $\pm$ 0.00)              |
| Phosphocreatine              | 8.05 ( $\pm$ 1.70) <sup>a,b</sup> | 6.32 ( $\pm$ 0.56) <sup>a</sup>   | 16.3 ( $\pm$ 4.45) <sup>b</sup> |
| Proline                      | 15.3 ( $\pm$ 0.71)                | 14.0 ( $\pm$ 0.64)                | 19.1 ( $\pm$ 1.41)              |
| Putrescine                   | 0.07 ( $\pm$ 0.00)                | 0.08 ( $\pm$ 0.01)                | 0.04 ( $\pm$ 0.00)              |
| Sarcosine                    | 0.48 ( $\pm$ 0.05)                | 0.56 ( $\pm$ 0.03)                | 0.42 ( $\pm$ 0.09)              |
| Serine                       | 22.1 ( $\pm$ 0.78) <sup>b</sup>   | 18.3 ( $\pm$ 1.20) <sup>a,b</sup> | 10.0 ( $\pm$ 0.55) <sup>a</sup> |
| Serotonin                    | 0.01 ( $\pm$ 0.00)                | 0.01 ( $\pm$ 0.00)                | 0.01 ( $\pm$ 0.00)              |
| Spermidine                   | 0.83 ( $\pm$ 0.13)                | 0.77 ( $\pm$ 0.06)                | 0.82 ( $\pm$ 0.03)              |

|                            |                            |                            |                            |
|----------------------------|----------------------------|----------------------------|----------------------------|
| Spermine                   | 0.48 (± 0.05)              | 0.50 (± 0.13)              | 0.59 (± 0.02)              |
| Symmetric dimethylarginine | 4.36 (± 0.28)              | 3.26 (± 0.24)              | 3.38 (± 0.87)              |
| Taurine                    | 26.5 (± 2.69)              | 25.0 (± 1.84)              | 30.3 (± 1.84)              |
| Threonine                  | 4.49 (± 0.61)              | 3.82 (± 0.35)              | 4.99 (± 0.67)              |
| Total dimethylarginine     | 4.45 (± 0.19)              | 3.31 (± 0.21)              | 3.47 (± 0.86)              |
| trans-4-Hydroxyproline     | 4.39 (± 0.04)              | 4.25 (± 0.15)              | 4.53 (± 0.22)              |
| Trimethylamine N-oxide     | 3.35 (± 0.69)              | 2.83 (± 0.08)              | 3.22 (± 0.02)              |
| Tryptophan                 | 0.83 (± 0.02)              | 0.74 (± 0.06)              | 0.83 (± 0.11)              |
| Tyramine                   | 0.01*                      | 0.01 (± 0.01)              | 0.00 (± 0.00)              |
| Tyrosine                   | 0.31 (± 0.01)              | 0.28 (± 0.08)              | 0.64 (± 0.02)              |
| Valine                     | 7.49 (± 0.12) <sup>a</sup> | 7.27 (± 1.09) <sup>a</sup> | 11.3 (± 1.34) <sup>b</sup> |

**Table S2:** Average concentrations of total metabolites ( $\mu\text{M}$ ) for sweet whey powder derived from perennial ryegrass (GRS), perennial ryegrass/white clover (CLV) and total mixed ration (TMR) feeding systems, determined by LC-MS/MS.

<sup>a,b</sup> indicates values within a row not sharing a common superscript letter differed significantly ( $p < 0.05$ ).

\* denotes where a replicate was below the limit of detection or limit of quantification.

| Metabolite ( $\mu\text{M}$ ) | GRS                             | CLV                               | TMR                             |
|------------------------------|---------------------------------|-----------------------------------|---------------------------------|
| Acetylorntine                | 1.26 ( $\pm$ 0.25)              | 0.87 ( $\pm$ 0.15)                | 0.80 ( $\pm$ 0.04)              |
| Alanine                      | 44.6 ( $\pm$ 7.64)              | 35.2 ( $\pm$ 2.90)                | 39.2 ( $\pm$ 5.30)              |
| alpha-Aminoadipic acid       | 10.6 ( $\pm$ 3.15)              | 9.32 ( $\pm$ 2.67)                | 7.69 ( $\pm$ 1.15)              |
| Arginine                     | 16.0 ( $\pm$ 2.90)              | 14.7 ( $\pm$ 0.00)                | 14.9 ( $\pm$ 0.64)              |
| Asparagine                   | 1.25*                           | 1.70*                             | 3.24 ( $\pm$ 1.13)              |
| Aspartic acid                | 10.5 ( $\pm$ 0.28)              | 18.7 ( $\pm$ 11.31)               | 10.2 ( $\pm$ 0.66)              |
| Asymmetric dimethylarginine  | 0.18 ( $\pm$ 0.06)              | 0.04 ( $\pm$ 0.02)                | 0.06 ( $\pm$ 0.04)              |
| Betaine                      | 80.7 ( $\pm$ 16.48)             | 63.9 ( $\pm$ 23.05)               | 73.0 ( $\pm$ 19.09)             |
| Carnosine                    | 0.40 ( $\pm$ 0.06)              | 0.39 ( $\pm$ 0.04)                | 0.48 ( $\pm$ 0.08)              |
| Choline                      | 1415 ( $\pm$ 219.20)            | 1224 ( $\pm$ 574.17)              | 892 ( $\pm$ 1.41)               |
| cis-4-Hydroxyproline         | 0.34 ( $\pm$ 0.00)              | 0.33 ( $\pm$ 0.01)                | 0.32 ( $\pm$ 0.01)              |
| Citrulline                   | 1.50 ( $\pm$ 0.28)              | 1.38 ( $\pm$ 1.20)                | 2.46 ( $\pm$ 0.69)              |
| Creatine                     | 761 ( $\pm$ 108.19)             | 543 ( $\pm$ 26.16)                | 561 ( $\pm$ 101.82)             |
| Creatinine                   | 115 ( $\pm$ 14.85)              | 93.6 ( $\pm$ 6.93)                | 72.9 ( $\pm$ 5.59)              |
| Diacetylspermine             | 0.03 ( $\pm$ 0.00)              | 0.03 ( $\pm$ 0.00)                | 0.03 ( $\pm$ 0.00)              |
| Dihydroxyphenylalanine       | 0.21 ( $\pm$ 0.02)              | 0.17 ( $\pm$ 0.02)                | 0.17 ( $\pm$ 0.00)              |
| Dopamine                     | 0.08 ( $\pm$ 0.00)              | 0.08*                             | 0.08 ( $\pm$ 0.00)              |
| Glutamic acid                | 318 ( $\pm$ 46.67)              | 297 ( $\pm$ 33.23)                | 238 ( $\pm$ 9.19)               |
| Glutamine                    | 1.36 <sup>*a</sup>              | 0.187 ( $\pm$ 0.02) <sup>a</sup>  | 7.02 ( $\pm$ 3.20) <sup>b</sup> |
| Glycine                      | 93.9 ( $\pm$ 55.37)             | 61.7 ( $\pm$ 1.13)                | 47.8 ( $\pm$ 11.17)             |
| Histidine                    | 2.61 ( $\pm$ 0.74)              | 2.50 ( $\pm$ 0.16)                | 3.11 ( $\pm$ 0.53)              |
| Isoleucine                   | 3.10 ( $\pm$ 0.71)              | 2.49 ( $\pm$ 0.39)                | 3.81 ( $\pm$ 0.28)              |
| Leucine                      | 3.20 ( $\pm$ 0.48)              | 3.24 ( $\pm$ 0.24)                | 4.16 ( $\pm$ 2.14)              |
| Lysine                       | 18.6 ( $\pm$ 2.90)              | 14.0 ( $\pm$ 2.12)                | 12.5 ( $\pm$ 1.13)              |
| Methionine                   | 1.34 ( $\pm$ 0.08)              | 1.23 ( $\pm$ 0.04)                | 0.95 ( $\pm$ 0.14)              |
| Methionine sulfoxide         | 0.42 ( $\pm$ 0.14)              | 0.47 ( $\pm$ 0.06)                | 0.25 ( $\pm$ 0.31)              |
| Methylhistidine              | 1.26 ( $\pm$ 0.25)              | 1.13 ( $\pm$ 0.28)                | 0.92 ( $\pm$ 0.04)              |
| Ornithine                    | 2.89 ( $\pm$ 1.20)              | 1.92 ( $\pm$ 0.03)                | 2.76 ( $\pm$ 0.28)              |
| Phenylalanine                | 1.72 ( $\pm$ 0.08)              | 1.51 ( $\pm$ 0.06)                | 1.46 ( $\pm$ 0.02)              |
| Phosphocreatine              | 9.65 ( $\pm$ 0.93) <sup>a</sup> | 6.49 ( $\pm$ 0.70) <sup>a</sup>   | 22.6 ( $\pm$ 6.01) <sup>b</sup> |
| Proline                      | 16.8 ( $\pm$ 2.33)              | 15.5 ( $\pm$ 0.07)                | 18.3 ( $\pm$ 0.49)              |
| Putrescine                   | 0.06 ( $\pm$ 0.01)              | 0.06 ( $\pm$ 0.02)                | 0.04 ( $\pm$ 0.04)              |
| Sarcosine                    | 0.54 ( $\pm$ 0.21)              | 0.47 ( $\pm$ 0.17)                | 0.33 ( $\pm$ 0.03)              |
| Serine                       | 25.3 ( $\pm$ 3.11) <sup>b</sup> | 18.7 ( $\pm$ 2.33) <sup>a,b</sup> | 9.31 ( $\pm$ 0.64) <sup>a</sup> |
| Serotonin                    | 0.01 ( $\pm$ 0.00)              | 0.01 ( $\pm$ 0.00)                | 0.01 ( $\pm$ 0.00)              |
| Spermidine                   | 0.34 ( $\pm$ 0.04)              | 0.35 ( $\pm$ 0.04)                | 0.30 ( $\pm$ 0.00)              |
| Spermine                     | 0.05 ( $\pm$ 0.00)              | 0.06 ( $\pm$ 0.03)                | 0.08 ( $\pm$ 0.01)              |
| Symmetric                    | 4.60 ( $\pm$ 0.95)              | 3.30 ( $\pm$ 0.63)                | 3.06 ( $\pm$ 0.39)              |

|                        |               |               |               |
|------------------------|---------------|---------------|---------------|
| dimethylarginine       |               |               |               |
| Taurine                | 29.8 (± 6.36) | 28.4 (± 0.49) | 30.5 (± 1.06) |
| Threonine              | 5.19 (± 1.20) | 3.41 (± 0.50) | 4.41 (± 0.18) |
| Total dimethylarginine | 4.79 (± 1.01) | 3.35 (± 0.64) | 3.12 (± 0.43) |
| trans-4-Hydroxyproline | 4.84 (± 0.30) | 4.45 (± 0.17) | 4.41 (± 0.37) |
| Trimethylamine N-oxide | 3.33 (± 0.41) | 3.19 (± 0.01) | 3.32 (± 0.35) |
| Tryptophan             | 0.89 (± 0.35) | 0.79 (± 0.01) | 0.70 (± 0.10) |
| Tyramine               | 0.01 (± 0.00) | 0.01 (± 0.00) | 0.01 (± 0.00) |
| Tyrosine               | 0.42 (± 0.26) | 0.28 (± 0.02) | 0.51 (± 0.22) |
| Valine                 | 8.50 (± 2.83) | 7.78 (± 0.72) | 10.6 (± 0.00) |

---

**Table S3:** Average concentrations of total metabolites ( $\mu\text{M}$ ) for ideal whey powder derived from perennial ryegrass (GRS), perennial ryegrass/white clover (CLV) and total mixed ration (TMR) feeding systems, determined by LC-MS/MS.

<sup>a,b</sup> indicates values within a row not sharing a common superscript letter differed significantly ( $p < 0.05$ ).

\* denotes where a replicate was below the limit of detection or limit of quantification.

| Metabolite ( $\mu\text{M}$ ) | GRS                             | CLV                               | TMR                             |
|------------------------------|---------------------------------|-----------------------------------|---------------------------------|
| Acetylorntine                | 0.96 ( $\pm$ 0.30)              | 0.98 ( $\pm$ 0.22)                | 0.78 ( $\pm$ 0.07)              |
| Alanine                      | 36.9 ( $\pm$ 4.03)              | 33.0 ( $\pm$ 1.84)                | 42.3 ( $\pm$ 4.03)              |
| alpha-Aminoadipic acid       | 7.56 ( $\pm$ 1.16)              | 6.01 ( $\pm$ 2.51)                | 6.00 ( $\pm$ 0.57)              |
| Arginine                     | 13.4 ( $\pm$ 1.20)              | 13.8 ( $\pm$ 0.21)                | 15.6 ( $\pm$ 0.21)              |
| Asparagine                   | 1.45 ( $\pm$ 0.37)              | 0.34*                             | 3.18 ( $\pm$ 0.95)              |
| Aspartic acid                | 11.6 ( $\pm$ 0.99)              | 10.8 ( $\pm$ 2.93)                | 15.2 ( $\pm$ 2.19)              |
| Asymmetric dimethylarginine  | 0.07 ( $\pm$ 0.03)              | 0.06 ( $\pm$ 0.02)                | 0.15 ( $\pm$ 0.01)              |
| Betaine                      | 85.5 ( $\pm$ 17.96)             | 66.8 ( $\pm$ 9.90)                | 83.8 ( $\pm$ 25.81)             |
| Carnosine                    | 0.38 ( $\pm$ 0.04)              | 0.37 ( $\pm$ 0.00)                | 0.43 ( $\pm$ 0.01)              |
| Choline                      | 1225 ( $\pm$ 120.21)            | 1020 ( $\pm$ 282.84)              | 906 ( $\pm$ 19.80)              |
| cis-4-Hydroxyproline         | 0.33 ( $\pm$ 0.01)              | 0.31 ( $\pm$ 0.01)                | 0.32 ( $\pm$ 0.01)              |
| Citrulline                   | 1.40 ( $\pm$ 0.25)              | 1.67 ( $\pm$ 0.13)                | 2.66 ( $\pm$ 0.16)              |
| Creatine                     | 513 ( $\pm$ 29.70)              | 519 ( $\pm$ 12.02)                | 500 ( $\pm$ 55.86)              |
| Creatinine                   | 125 ( $\pm$ 12.02)              | 107 ( $\pm$ 17.47)                | 101 ( $\pm$ 8.84)               |
| Diacetylspermine             | 0.03 ( $\pm$ 0.00)              | 0.03 ( $\pm$ 0.00)                | 0.03 ( $\pm$ 0.00)              |
| Dihydroxyphenylalanine       | 0.18 ( $\pm$ 0.01)              | 0.18 ( $\pm$ 0.01)                | 0.15 ( $\pm$ 0.00)              |
| Dopamine                     | 0.08 ( $\pm$ 0.00)              | 0.08 ( $\pm$ 0.00)                | 0.08 ( $\pm$ 0.00)              |
| Glutamic acid                | 266 ( $\pm$ 27.58)              | 269 ( $\pm$ 70.00)                | 282 ( $\pm$ 26.87)              |
| Glutamine                    | 4.04 ( $\pm$ 0.23) <sup>a</sup> | 3.19 ( $\pm$ 1.77) <sup>a</sup>   | 11.5 ( $\pm$ 2.64) <sup>b</sup> |
| Glycine                      | 66.8 ( $\pm$ 15.49)             | 61.2 ( $\pm$ 5.37)                | 56.4 ( $\pm$ 7.85)              |
| Histidine                    | 2.35 ( $\pm$ 0.50)              | 2.39 ( $\pm$ 0.45)                | 3.02 ( $\pm$ 0.17)              |
| Isoleucine                   | 2.76 ( $\pm$ 0.08)              | 2.78 ( $\pm$ 0.44)                | 3.86 ( $\pm$ 0.38)              |
| Leucine                      | 2.56 ( $\pm$ 1.63)              | 2.68 ( $\pm$ 1.61)                | 5.54 ( $\pm$ 0.10)              |
| Lysine                       | 15.8 ( $\pm$ 1.20)              | 12.8 ( $\pm$ 0.64)                | 13.2 ( $\pm$ 2.33)              |
| Methionine                   | 0.41 ( $\pm$ 0.29)              | 0.32 ( $\pm$ 0.37)                | 0.31 ( $\pm$ 0.07)              |
| Methionine sulfoxide         | 0.20 ( $\pm$ 0.09)              | 0.29 ( $\pm$ 0.07)                | 0.35 ( $\pm$ 0.04)              |
| Methylhistidine              | 1.26 ( $\pm$ 0.13)              | 0.92 ( $\pm$ 0.11)                | 0.83 ( $\pm$ 0.03)              |
| Ornithine                    | 2.54 ( $\pm$ 0.64)              | 2.37 ( $\pm$ 1.01)                | 2.79 ( $\pm$ 0.75)              |
| Phenylalanine                | 1.46 ( $\pm$ 0.08)              | 1.38 ( $\pm$ 0.06)                | 1.38 ( $\pm$ 0.01)              |
| Phosphocreatine              | 7.21 ( $\pm$ 1.64) <sup>a</sup> | 5.37 ( $\pm$ 0.61) <sup>a</sup>   | 17.1 ( $\pm$ 1.41) <sup>b</sup> |
| Proline                      | 15.8 ( $\pm$ 0.07)              | 14.7 ( $\pm$ 1.27)                | 19.0 ( $\pm$ 1.13)              |
| Putrescine                   | 0.05 ( $\pm$ 0.01)              | 0.05 ( $\pm$ 0.04)                | 0.02 ( $\pm$ 0.02)              |
| Sarcosine                    | 0.56 ( $\pm$ 0.12)              | 0.51 ( $\pm$ 0.04)                | 0.48 ( $\pm$ 0.05)              |
| Serine                       | 21.9 ( $\pm$ 1.13) <sup>b</sup> | 18.8 ( $\pm$ 1.27) <sup>a,b</sup> | 9.62 ( $\pm$ 1.10) <sup>a</sup> |
| Serotonin                    | 0.01 ( $\pm$ 0.00)              | 0.01 ( $\pm$ 0.00)                | 0.01 ( $\pm$ 0.00)              |
| Spermidine                   | 0.29 ( $\pm$ 0.04)              | 0.26 ( $\pm$ 0.05)                | 0.24 ( $\pm$ 0.06)              |
| Spermine                     | 0.07 ( $\pm$ 0.01)              | 0.07 ( $\pm$ 0.01)                | 0.07 ( $\pm$ 0.00)              |
| Symmetric                    | 3.82 ( $\pm$ 0.08)              | 2.80 ( $\pm$ 0.46)                | 2.73 ( $\pm$ 0.25)              |

dimethylarginine

|                        |                            |                              |                            |
|------------------------|----------------------------|------------------------------|----------------------------|
| Taurine                | 26.9 (± 2.33)              | 26.4 (± 1.56)                | 29.6 (± 1.70)              |
| Threonine              | 4.88 (± 0.09)              | 3.90 (± 0.55)                | 4.08 (± 1.00)              |
| Total dimethylarginine | 3.90 (± 0.05)              | 2.86 (± 0.48)                | 2.88 (± 0.26)              |
| trans-4-Hydroxyproline | 4.21 (± 0.40)              | 4.03 (± 0.76)                | 4.53 (± 0.07)              |
| Trimethylamine N-oxide | 2.77 (± 0.30)              | 2.82 (± 0.04)                | 3.10 (± 0.29)              |
| Tryptophan             | 0.70 (± 0.06)              | 0.64 (± 0.11)                | 0.75 (± 0.02)              |
| Tyramine               | 0.01 (± 0.00)              | 0.00*                        | 0.01 (± 0.01)              |
| Tyrosine               | 0.27 (± 0.04)              | 0.28 (± 0.16)                | 0.48 (± 0.18)              |
| Valine                 | 7.00 (± 0.74) <sup>a</sup> | 7.92 (± 1.43) <sup>a,b</sup> | 10.6 (± 0.07) <sup>b</sup> |

**Table S4:** Average concentrations of total metabolites ( $\mu\text{M}$ ) for acid whey powder derived from perennial ryegrass (GRS), perennial ryegrass/white clover (CLV) and total mixed ration (TMR) feeding systems, determined by LC-MS/MS.

<sup>a,b</sup> indicates values within a row not sharing a common superscript letter differed significantly ( $p < 0.05$ ).

\* denotes where a replicate was below the limit of detection or limit of quantification.

| Metabolite ( $\mu\text{M}$ ) | GRS                             | CLV                             | TMR                             |
|------------------------------|---------------------------------|---------------------------------|---------------------------------|
| Acetylorntine                | 4.18 ( $\pm$ 0.16)              | 2.58 ( $\pm$ 0.11)              | 2.36 ( $\pm$ 1.53)              |
| Alanine                      | 27.7 ( $\pm$ 2.19)              | 34.1 ( $\pm$ 5.37)              | 40.6 ( $\pm$ 3.04)              |
| alpha-Aminoadipic acid       | 23.9 ( $\pm$ 7.14)              | 28.0 ( $\pm$ 28.61)             | 40.8 ( $\pm$ 2.26)              |
| Arginine                     | 12.9 ( $\pm$ 1.63)              | 16.4 ( $\pm$ 3.11)              | 16.0 ( $\pm$ 1.13)              |
| Asparagine                   | 2.98 ( $\pm$ 0.16)              | 0.32*                           | 1.32 ( $\pm$ 0.12)              |
| Aspartic acid                | 6.98 ( $\pm$ 1.03)              | 13.3 ( $\pm$ 12.47)             | 4.95 ( $\pm$ 0.34)              |
| Asymmetric dimethylarginine  | 0.06 ( $\pm$ 0.01)              | 0.07 ( $\pm$ 0.00)              | 0.11 ( $\pm$ 0.04)              |
| Betaine                      | 75.9 ( $\pm$ 26.87)             | 70.7 ( $\pm$ 37.19)             | 84.9 ( $\pm$ 6.43)              |
| Carnosine                    | 0.33 ( $\pm$ 0.09)              | 0.30 ( $\pm$ 0.06)              | 0.39 ( $\pm$ 0.01)              |
| Choline                      | 1160 ( $\pm$ 98.99)             | 1076 ( $\pm$ 501.34)            | 950 ( $\pm$ 84.85)              |
| cis-4-Hydroxyproline         | 0.31 ( $\pm$ 0.00)              | 0.31*                           | 0.33*                           |
| Citrulline                   | 0.33 ( $\pm$ 0.13)              | 0.66 ( $\pm$ 0.11)              | 0.86 ( $\pm$ 0.32)              |
| Creatine                     | 483 ( $\pm$ 60.10)              | 661 ( $\pm$ 119.50)             | 612 ( $\pm$ 144.96)             |
| Creatinine                   | 99.4 ( $\pm$ 3.68)              | 104 ( $\pm$ 14.35)              | 94.0 ( $\pm$ 5.52)              |
| Diacetylspermine             | 0.03 ( $\pm$ 0.00)              | 0.03 ( $\pm$ 0.00)              | 0.03 ( $\pm$ 0.00)              |
| Dihydroxyphenylalanine       | 0.14 ( $\pm$ 0.01)              | 0.12 ( $\pm$ 0.01)              | 0.15 ( $\pm$ 0.05)              |
| Dopamine                     | 0.08 ( $\pm$ 0.00)              | 0.08 ( $\pm$ 0.00)              | 0.08 ( $\pm$ 0.00)              |
| Glutamic acid                | 262 ( $\pm$ 37.48)              | 255 ( $\pm$ 69.30)              | 234 ( $\pm$ 25.46)              |
| Glutamine                    | 2.39 ( $\pm$ 1.74) <sup>a</sup> | 2.97 ( $\pm$ 1.07) <sup>a</sup> | 12.3 ( $\pm$ 0.42) <sup>b</sup> |
| Glycine                      | 56.1 ( $\pm$ 9.62)              | 57.3 ( $\pm$ 0.28)              | 41.2 ( $\pm$ 0.49)              |
| Histidine                    | 2.34 ( $\pm$ 0.55)              | 2.49 ( $\pm$ 0.01)              | 3.21 ( $\pm$ 0.15)              |
| Isoleucine                   | 2.80 ( $\pm$ 0.02)              | 2.58 ( $\pm$ 1.53)              | 3.73 ( $\pm$ 1.13)              |
| Leucine                      | 12.0 ( $\pm$ 5.82)              | 8.28 ( $\pm$ 3.57)              | 14.6 ( $\pm$ 0.71)              |
| Lysine                       | 12.7 ( $\pm$ 4.04)              | 12.5 ( $\pm$ 1.13)              | 11.4 ( $\pm$ 7.95)              |
| Methionine                   | 0.47 ( $\pm$ 0.10)              | 0.49 ( $\pm$ 0.10)              | 0.43 ( $\pm$ 0.24)              |
| Methionine sulfoxide         | 0.16 ( $\pm$ 0.21)              | 0.44 ( $\pm$ 0.25)              | 0.14 ( $\pm$ 0.08)              |
| Methylhistidine              | 1.27 ( $\pm$ 0.14)              | 1.36 ( $\pm$ 0.13)              | 0.97 ( $\pm$ 0.16)              |
| Ornithine                    | 3.22 ( $\pm$ 0.83)              | 2.68 ( $\pm$ 0.04)              | 3.35 ( $\pm$ 0.82)              |
| Phenylalanine                | 1.22 ( $\pm$ 0.09)              | 1.09 ( $\pm$ 0.21)              | 1.41 ( $\pm$ 0.29)              |
| Phosphocreatine              | 3.56 ( $\pm$ 0.24)              | 3.66 ( $\pm$ 0.84)              | 4.35 ( $\pm$ 0.47)              |
| Proline                      | 14.8 ( $\pm$ 2.47)              | 14.7 ( $\pm$ 2.12)              | 19.1 ( $\pm$ 2.26)              |
| Putrescine                   | 0.08 ( $\pm$ 0.02)              | 0.05*                           | 0.01*                           |
| Sarcosine                    | 0.41 ( $\pm$ 0.06)              | 0.39 ( $\pm$ 0.01)              | 0.40 ( $\pm$ 0.01)              |
| Serine                       | 20.2 ( $\pm$ 0.64)              | 17.5 ( $\pm$ 8.27)              | 11.2 ( $\pm$ 2.63)              |
| Serotonin                    | 0.01 ( $\pm$ 0.00)              | 0.01 ( $\pm$ 0.00)              | 0.01 ( $\pm$ 0.00)              |
| Spermidine                   | 0.71 ( $\pm$ 0.04)              | 0.58 ( $\pm$ 0.15)              | 0.56 ( $\pm$ 0.12)              |
| Spermine                     | 0.26 ( $\pm$ 0.07)              | 0.22 ( $\pm$ 0.08)              | 0.30 ( $\pm$ 0.21)              |
| Symmetric                    | 3.40 ( $\pm$ 0.38)              | 2.94 ( $\pm$ 1.58)              | 2.77 ( $\pm$ 0.03)              |

|                        |                            |                            |                            |
|------------------------|----------------------------|----------------------------|----------------------------|
| dimethylarginine       |                            |                            |                            |
| Taurine                | 26.0 (± 5.16)              | 26.0 (± 3.04)              | 30.0 (± 3.46)              |
| Threonine              | 1.69 (± 0.76)              | 1.02 (± 0.40)              | 1.28 (± 0.41)              |
| Total dimethylarginine | 3.46 (± 0.37)              | 3.01 (± 1.58)              | 2.88 (± 0.07)              |
| trans-4-Hydroxyproline | 4.09 (± 1.12)              | 4.01 (± 0.11)              | 4.48 (± 0.38)              |
| Trimethylamine N-oxide | 2.57 (± 0.05)              | 3.21 (± 0.69)              | 3.13 (± 0.48)              |
| Tryptophan             | 0.45 (± 0.11)              | 0.57 (± 0.10)              | 0.58 (± 0.12)              |
| Tyramine               | 0.01 (± 0.00)              | 0.00 (± 0.00)              | 0.00*                      |
| Tyrosine               | 0.00*                      | 0.00*                      | 0.08*                      |
| Valine                 | 6.80 (± 1.97) <sup>a</sup> | 7.29 (± 0.69) <sup>a</sup> | 12.0 (± 1.63) <sup>b</sup> |



**Table S5:** Average concentrations of total metabolites ( $\mu\text{M}$ ) from skim milk powder, sweet whey powder, ideal whey powder and acid whey powder derived from perennial ryegrass (GRS), perennial ryegrass/white clover (CLV) and total mixed ration (TMR) feeding systems, determined by LC-MS/MS.

<sup>a,b</sup> indicates values within a row not sharing a common superscript letter differed significantly ( $p < 0.05$ ).

| Metabolite ( $\mu\text{M}$ ) | GRS                               | CLV                                | TMR                               |
|------------------------------|-----------------------------------|------------------------------------|-----------------------------------|
| Acetylorntine                | 1.84 ( $\pm$ 1.57)                | 1.26 ( $\pm$ 0.90)                 | 1.20 ( $\pm$ 0.77)                |
| Alanine                      | 35.8 ( $\pm$ 7.02) <sup>a,b</sup> | 33.1 ( $\pm$ 2.15) <sup>a</sup>    | 41.0 ( $\pm$ 1.40) <sup>b</sup>   |
| alpha-Aminoadipic acid       | 12.2 ( $\pm$ 7.93)                | 12.2 ( $\pm$ 10.66)                | 15.5 ( $\pm$ 16.90)               |
| Arginine                     | 14.1 ( $\pm$ 1.36)                | 14.9 ( $\pm$ 1.11)                 | 15.8 ( $\pm$ 0.74)                |
| Asparagine                   | 1.77 ( $\pm$ 0.81) <sup>a,b</sup> | 1.12 ( $\pm$ 0.92) <sup>a</sup>    | 2.26 ( $\pm$ 1.10) <sup>b</sup>   |
| Aspartic acid                | 9.83 ( $\pm$ 1.99)                | 15.0 ( $\pm$ 3.62)                 | 10.5 ( $\pm$ 4.22)                |
| Asymmetric dimethylarginine  | 0.10 ( $\pm$ 0.05)                | 0.06 ( $\pm$ 0.01)                 | 0.10 ( $\pm$ 0.04)                |
| Betaine                      | 79.1 ( $\pm$ 5.10) <sup>a,b</sup> | 65.6 ( $\pm$ 4.16) <sup>a</sup>    | 83.9 ( $\pm$ 8.66) <sup>b</sup>   |
| Carnosine                    | 0.36 ( $\pm$ 0.03) <sup>a</sup>   | 0.36 ( $\pm$ 0.05) <sup>a</sup>    | 0.44 ( $\pm$ 0.04) <sup>b</sup>   |
| Choline                      | 1261 ( $\pm$ 108.73) <sup>b</sup> | 1085 ( $\pm$ 95.49) <sup>a,b</sup> | 945 ( $\pm$ 64.43) <sup>a</sup>   |
| cis-4-Hydroxyproline         | 0.32 ( $\pm$ 0.01)                | 0.32 ( $\pm$ 0.01)                 | 0.32 ( $\pm$ 0.01)                |
| Citrulline                   | 1.28 ( $\pm$ 0.67) <sup>a</sup>   | 1.35 ( $\pm$ 0.49) <sup>a</sup>    | 2.07 ( $\pm$ 0.82) <sup>b</sup>   |
| Creatine                     | 567 ( $\pm$ 130.27)               | 557 ( $\pm$ 70.49)                 | 559 ( $\pm$ 46.08)                |
| Creatinine                   | 112 ( $\pm$ 10.36) <sup>b</sup>   | 99.3 ( $\pm$ 6.97) <sup>a,b</sup>  | 90.1 ( $\pm$ 11.96) <sup>a</sup>  |
| Diacetylspermine             | 0.03 ( $\pm$ 0.00)                | 0.03 ( $\pm$ 0.00)                 | 0.03 ( $\pm$ 0.00)                |
| Dihydroxyphenylalanine       | 0.18 ( $\pm$ 0.03)                | 0.16 ( $\pm$ 0.03)                 | 0.16 ( $\pm$ 0.01)                |
| Dopamine                     | 0.08 ( $\pm$ 0.00)                | 0.08 ( $\pm$ 0.00)                 | 0.08 ( $\pm$ 0.00)                |
| Glutamic acid                | 275 ( $\pm$ 28.76)                | 276 ( $\pm$ 18.09)                 | 248 ( $\pm$ 22.43)                |
| Glutamine                    | 3.04 ( $\pm$ 1.42) <sup>a</sup>   | 2.82 ( $\pm$ 1.97) <sup>a</sup>    | 10.8 ( $\pm$ 2.56) <sup>b</sup>   |
| Glycine                      | 70.4 ( $\pm$ 16.30)               | 58.6 ( $\pm$ 3.49)                 | 54.9 ( $\pm$ 14.26)               |
| Histidine                    | 2.41 ( $\pm$ 0.13) <sup>a</sup>   | 2.44 ( $\pm$ 0.07) <sup>a</sup>    | 3.18 ( $\pm$ 0.17) <sup>b</sup>   |
| Isoleucine                   | 2.78 ( $\pm$ 0.25) <sup>a</sup>   | 2.56 ( $\pm$ 0.16) <sup>a</sup>    | 3.93 ( $\pm$ 0.27) <sup>b</sup>   |
| Leucine                      | 5.10 ( $\pm$ 4.60) <sup>a,b</sup> | 4.32 ( $\pm$ 2.65) <sup>a</sup>    | 7.47 ( $\pm$ 4.80) <sup>b</sup>   |
| Lysine                       | 15.7 ( $\pm$ 2.37)                | 13.3 ( $\pm$ 0.74)                 | 12.5 ( $\pm$ 0.78)                |
| Methionine                   | 0.72 ( $\pm$ 0.42)                | 0.69 ( $\pm$ 0.40)                 | 0.53 ( $\pm$ 0.29)                |
| Methionine sulfoxide         | 0.21 ( $\pm$ 0.15)                | 0.40 ( $\pm$ 0.10)                 | 0.24 ( $\pm$ 0.09)                |
| Methylhistidine              | 1.25 ( $\pm$ 0.03) <sup>b</sup>   | 1.10 ( $\pm$ 0.19) <sup>a,b</sup>  | 0.93 ( $\pm$ 0.07) <sup>a</sup>   |
| Ornithine                    | 2.72 ( $\pm$ 0.42) <sup>a,b</sup> | 2.27 ( $\pm$ 0.33) <sup>a</sup>    | 3.26 ( $\pm$ 0.65) <sup>b</sup>   |
| Phenylalanine                | 1.46 ( $\pm$ 0.20) <sup>b</sup>   | 1.29 ( $\pm$ 0.19) <sup>a</sup>    | 1.41 ( $\pm$ 0.03) <sup>a,b</sup> |
| Phosphocreatine              | 7.12 ( $\pm$ 2.58) <sup>a</sup>   | 5.46 ( $\pm$ 1.30) <sup>a</sup>    | 15.1 ( $\pm$ 7.74) <sup>b</sup>   |
| Proline                      | 15.6 ( $\pm$ 0.85) <sup>a</sup>   | 14.7 ( $\pm$ 0.61) <sup>a</sup>    | 18.9 ( $\pm$ 0.41) <sup>b</sup>   |
| Putrescine                   | 0.06 ( $\pm$ 0.01) <sup>b</sup>   | 0.06 ( $\pm$ 0.02) <sup>b</sup>    | 0.03 ( $\pm$ 0.02) <sup>a</sup>   |
| Sarcosine                    | 0.50 ( $\pm$ 0.07)                | 0.48 ( $\pm$ 0.07)                 | 0.41 ( $\pm$ 0.06)                |
| Serine                       | 22.4 ( $\pm$ 2.15) <sup>c</sup>   | 18.3 ( $\pm$ 0.60) <sup>b</sup>    | 10.0 ( $\pm$ 0.85) <sup>a</sup>   |
| Serotonin                    | 0.01 ( $\pm$ 0.00)                | 0.01 ( $\pm$ 0.00)                 | 0.01 ( $\pm$ 0.00)                |
| Spermidine                   | 0.54 ( $\pm$ 0.27)                | 0.49 ( $\pm$ 0.23)                 | 0.48 ( $\pm$ 0.27)                |
| Spermine                     | 0.21 ( $\pm$ 0.20)                | 0.21 ( $\pm$ 0.21)                 | 0.26 ( $\pm$ 0.24)                |
| Symmetric                    | 4.04 ( $\pm$ 0.54) <sup>b</sup>   | 3.08 ( $\pm$ 0.25) <sup>a</sup>    | 2.98 ( $\pm$ 0.30) <sup>a</sup>   |

|                        |                                   |                                 |                                   |
|------------------------|-----------------------------------|---------------------------------|-----------------------------------|
| dimethylarginine       |                                   |                                 |                                   |
| Taurine                | 27.3 ( $\pm$ 1.72) <sup>a,b</sup> | 26.4 ( $\pm$ 1.41) <sup>a</sup> | 30.1 ( $\pm$ 0.38) <sup>b</sup>   |
| Threonine              | 4.06 ( $\pm$ 1.61) <sup>b</sup>   | 3.03 ( $\pm$ 1.36) <sup>a</sup> | 3.69 ( $\pm$ 1.65) <sup>a,b</sup> |
| Total dimethylarginine | 4.15 ( $\pm$ 0.59) <sup>b</sup>   | 3.13 ( $\pm$ 0.24) <sup>a</sup> | 3.09 ( $\pm$ 0.28) <sup>a</sup>   |
| trans-4-Hydroxyproline | 4.38 ( $\pm$ 0.33)                | 4.18 ( $\pm$ 0.21)              | 4.49 ( $\pm$ 0.06)                |
| Trimethylamine N-oxide | 3.00 ( $\pm$ 0.40)                | 3.01 ( $\pm$ 0.22)              | 3.19 ( $\pm$ 0.10)                |
| Tryptophan             | 0.72 ( $\pm$ 0.19)                | 0.68 ( $\pm$ 0.10)              | 0.71 ( $\pm$ 0.10)                |
| Tyramine               | 0.01 ( $\pm$ 0.00)                | 0.01 ( $\pm$ 0.00)              | 0.01 ( $\pm$ 0.00)                |
| Tyrosine               | 0.33 ( $\pm$ 0.08) <sup>a,b</sup> | 0.28 ( $\pm$ 0.00) <sup>a</sup> | 0.43 ( $\pm$ 0.24) <sup>b</sup>   |
| Valine                 | 7.45 ( $\pm$ 0.76) <sup>a</sup>   | 7.56 ( $\pm$ 0.34) <sup>a</sup> | 11.09 ( $\pm$ 0.66) <sup>b</sup>  |

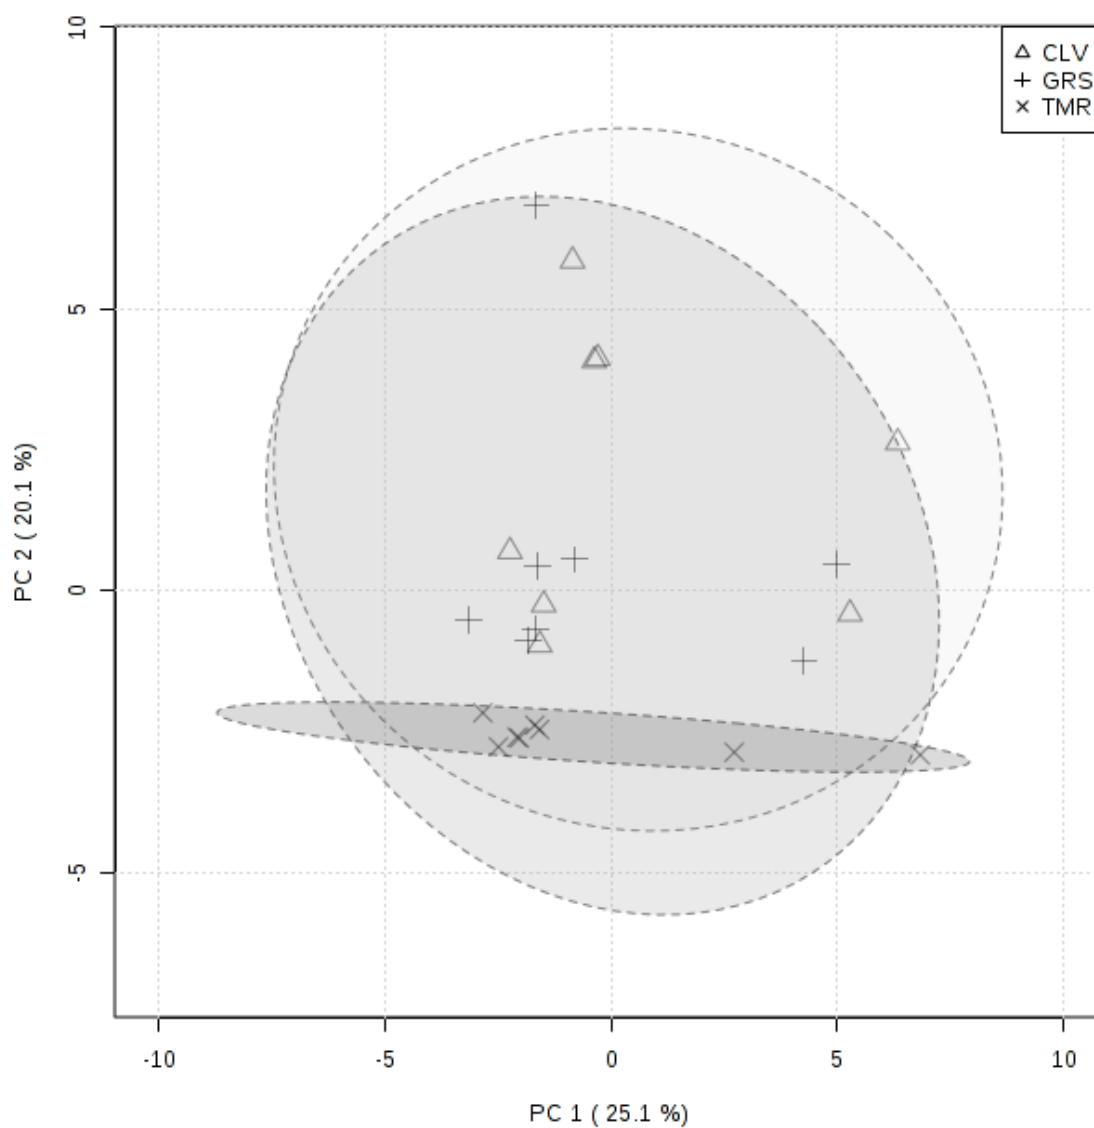

**Figure S1.** Principal component analysis (PCA) score plot for metabolomics analysis of protein ingredients from perennial ryegrass (GRS), perennial ryegrass/white clover (CLV) and total mixed ration (TMR) feeding systems, determined by LC-MS/MS.
